# Supplementary material
Source: HighWire-hosted journal article supplement (https://gut.bmj.com/content/71/9/1803)
Supplement: inline-supplementary-material-1 [file inline-supplementary-material-1.pdf]

Supplemental methods: Translated questionnaire

Follow up questionnaire of the MAMI study

Current date (dd/mm/yyyy): ...../...../.....

Current weight (kg) of the participant: ..... kg

Current length (cm) of the participant: ..... cm

**1. Were there any problems in the growth and/or development of your child?**

- ☐ There were no problems in the growth and/or development
- ☐ In case there were problems or particularities in the growth and/or development, please describe them in the section below:

**2. What kind of feeding did your child receive after birth:**

- ☐ Breastfeeding
- ☐ Formula feeding
- ☐ A combination of breastfeeding and formula feeding

**3. For how long did your child receive breastfeeding/formula feeding:**

- ☐ Breastfeeding from the age of ..... months, until the age of ..... months
- ☐ Formula feeding from the age of ..... months, until the age of ..... months

**4. At what age did you start supplementary solid feeding (like fruit and vegetable purees)**

- ☐ Supplementary feeding was started at the age of ..... months

**5. Did your child had to stay longer then suspected in the hospital?**

- ☐ No
- ☐ Yes. If yes, please describe the reason for the hospital admission in the section below:

**6. Did your child visit the general practitioner (GP) since his/her birth?**

- ☐ No
- ☐ Yes. If yes, please describe the number of GP visits and the reasons for the visits in the section below:

**7. Did your child visit a paediatrician since his/her birth?**

- ☐ No
- ☐ Yes. If yes, please describe the number of visits and the reasons for the visits in the section below:

**8. Has your child been admitted to the hospital since his/her birth?**

- ☐ No
- ☐ Yes. If yes, please describe the number of hospital admissions and the reasons for the admissions in the section below:

**9. Had there ever been blood tests performed in your child?**

- ☐ No
- ☐ Yes. If yes, please describe the reasons for the blood tests in the section below:

**10. Does child uses any antibiotics currently?**

- ☐ No
- ☐ Yes. If yes, please list the type of antibiotics, the indication for the antibiotics and when the antibiotics were started your child is using currently in the section below:

**11. Has your child used any antibiotics in the past?**

- ☐ No
- ☐ Yes. If yes, please list the type of antibiotic your child received (if you can recall which antibiotic), the indication for the antibiotic and the period of the antibiotic in the section below:

**12. Does child uses any medication other than antibiotics currently?**

- ☐ No
- ☐ Yes. If yes, please list all the medications your child is using currently and when the medication was started in the section below:

**13. Has your child used any other medication than antibiotics in the past?**

- ☐ No
- ☐ Yes. If yes, please write down which medication your child used, the indication for the medication and the period the medication was used in the section below:

**14. Does your child has any allergies?**

- ☐ No
- ☐ Yes. If yes, please down what he/she is allergic for in the section below:

**15. Does your child have eczema or did your child had eczema in the past?**

- ☐ No
- ☐ Yes

**16. Does your child have asthma (or asthmatic complaints for which your child needed medication) or did your child had this in the past?**

- ☐ No
- ☐ Yes

**17. Did your child receive all the vaccinations according the national vaccination schedule?**

- ☐ No
- ☐ Yes

**18. In case your child received any vaccinations, did your child had any side effects of the vaccinations(high fever >39.5 °C, allergic reaction, fainting or seizure)**

- ☐ No
- ☐ Yes. If yes, please write down what kind of side effects in the section below:

**This is the end of the questionnaire.**

**Thank you very much for your time.**
