# Supplementary material
Source: HighWire-hosted journal article supplement (https://gut.bmj.com/content/71/9/1803)
Supplement: inline-supplementary-material-6 [file inline-supplementary-material-6.pdf]

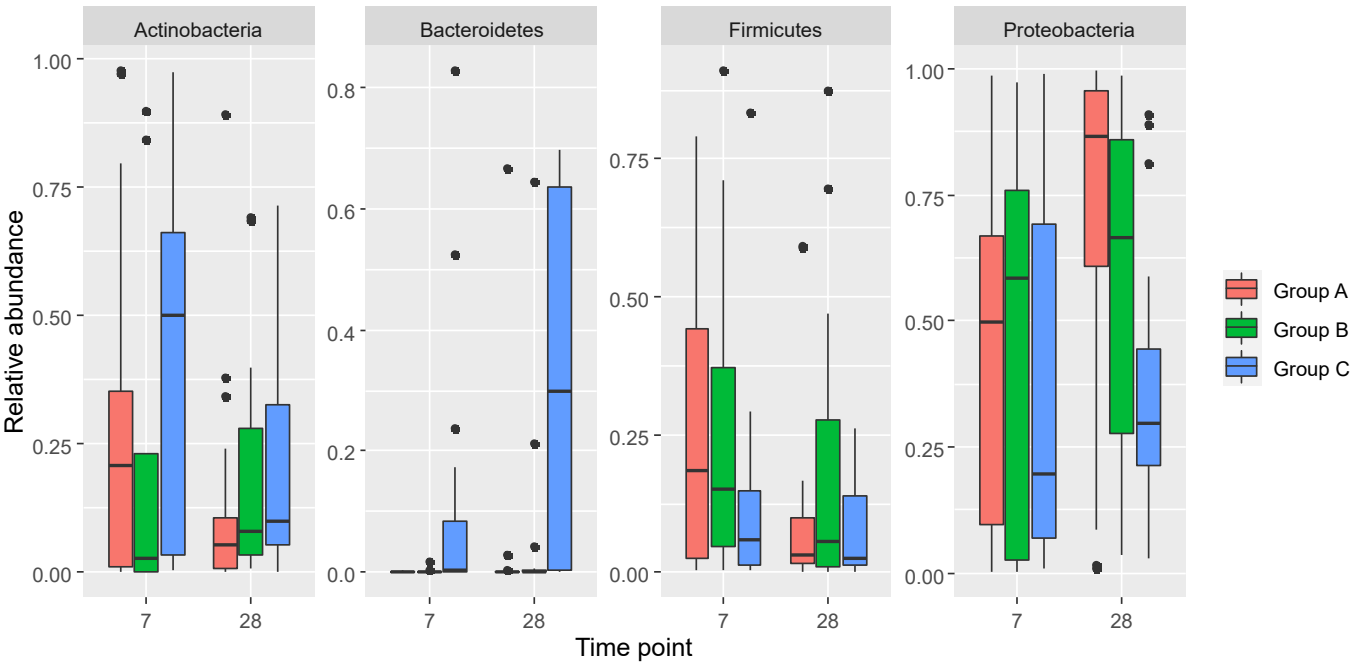

Figure S3
